# Supplementary material for: COVID-19 serological survey using micro blood sampling
Source: bioRxiv or medRxiv preprint supplement (doi:10.1101/2020.10.09.20209858), 2021-02-11
Supplement: Supplementary file [file media-1.pdf]

545 **Supplementary Information**

546

547 Title: COVID-19 serological survey using micro blood sampling

548

549 Authors: Melissa M. Matthews, Tae Gyun Kim, Satoshi Shibata, Noriko Shibata, Christian

550 Butcher, Jaekyung Hyun, Keon Young Kim, Theodore Robb, Siang Sheng Jheng, Masashi

551 Narita, Tomoari Mori, Mary Collins & Matthias Wolf

552

553

554

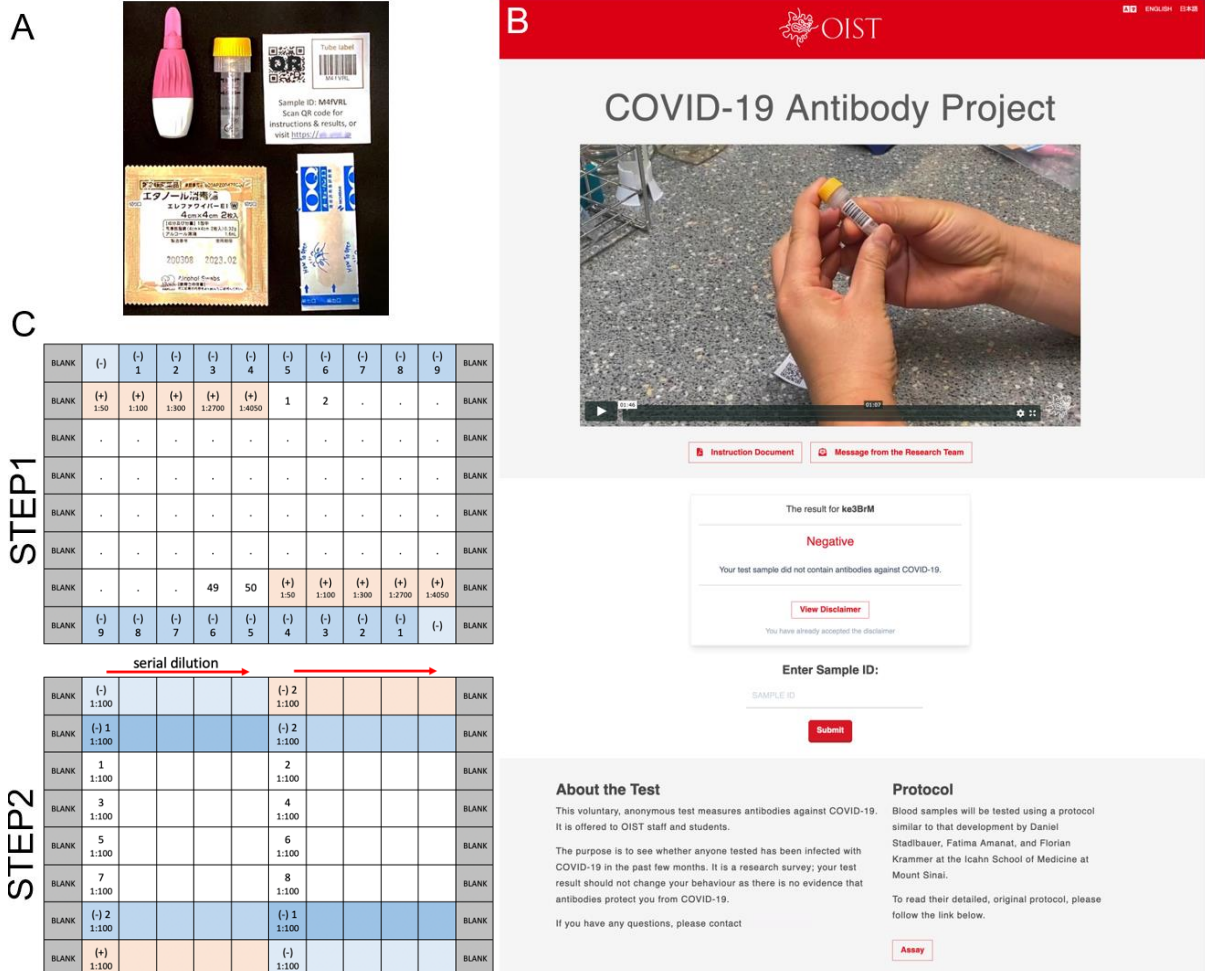

555

556

557

558 **Supplementary Figure 1: Antibody Survey Sample Collection Kit and Plate Design.**

559 blood sampling kit included BD Microtainer<sup>®</sup> contact-activated lancet (Becton Dickison, USA),

560 0.8 ml volume blood collection tube containing a coagulant and a separator (Greiner bio-one),

561 packaged alcohol wipes, adhesive bandage, and sticker with an identification barcode and QR

562 code. **B.** Front page of OIST Antibody Test website. **C.** Plate designs used in the ELISA. Plates

563 are modified versions of those described previously (1).

564

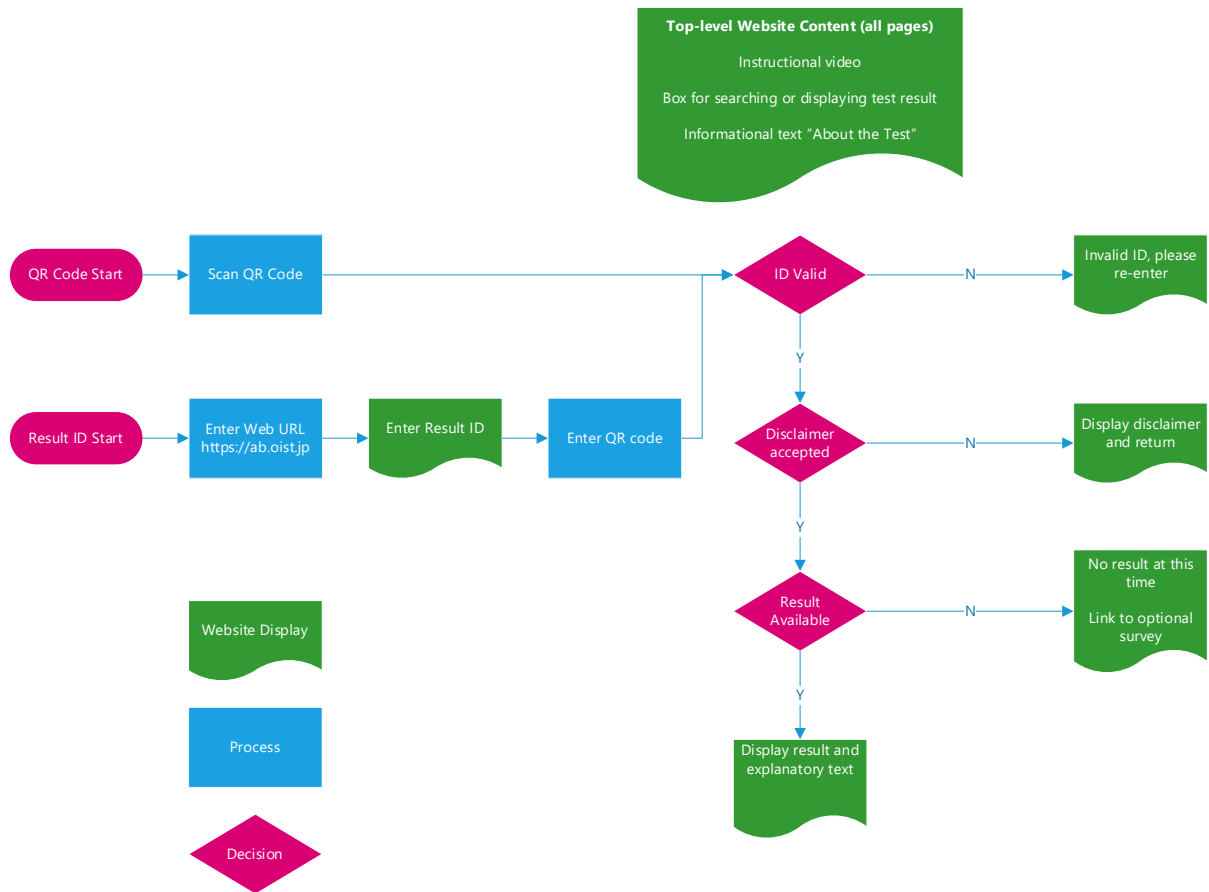

565

566

567 **Supplementary Figure 2:** Basic user flow followed by participants to view test results and  
 568 answer optional survey. The diagram was created with Microsoft Visio Professional.

569
